# Supplementary material for: Long-Term Efficacy and Safety of Biosimilar CT-P10 Versus Innovator Rituximab in Rheumatoid Arthritis: 48-Week Results from a Randomized Phase III Trial
Source: Springer Nature journal article supplement (doi:10.1007/s40259-018-00331-4), 2019-02-01
Supplement: MOESM1 [file 24111066]

## **Electronic supplementary information**

**Journal name: BioDrugs**

### **Long-term efficacy and safety of biosimilar CT-P10 versus innovator rituximab in rheumatoid arthritis: 48-week results from a randomized Phase 3 trial**

Chang-Hee Suh, Dae Hyun Yoo, Alfredo Berrocal Kasay, Elias Chalouhi El-Khoury, Francisco FidencioCons Molina, Pavel Shesternya, Pedro Miranda, Francisco G. Medina-Rodriguez, Piotr Wiland, Slawomir Jeka, Jose Chavez-Corrales, Thomas Linde, Pawel Hrycaj, Mauricio Abello-Banfi, Ihor Hospodarskyy, Janusz Jaworski, Mariusz Piotrowski, Marek Brzosko, Marek Krogulec, Sergii Shevchuk, Armando Calvo, Daina Andersone, Won Park, Seung Cheol Shim, Sang Joon Lee, Sung Young Lee.

**Corresponding author:** Professor Dae Hyun Yoo, Department of Rheumatology, Hanyang University Hospital for Rheumatic Diseases, Seoul, Republic of Korea. Email: dhyoo@hanyang.ac.kr

**Table S1** Mean scores and change from baseline in ACR individual components (efficacy population <sup>a)</sup>)

|                                                                    | <b>CT-P10</b>  |                 | <b>US-RTX</b>  |                 | <b>EU-RTX</b> |                 | <b>Combined RTX<sup>b</sup></b> |                 |
|--------------------------------------------------------------------|----------------|-----------------|----------------|-----------------|---------------|-----------------|---------------------------------|-----------------|
|                                                                    | <b>(n=155)</b> |                 | <b>(n=144)</b> |                 | <b>(n=59)</b> |                 | <b>(n=203)</b>                  |                 |
|                                                                    | <b>Actual</b>  | <b>Change</b>   | <b>Actual</b>  | <b>Change</b>   | <b>Actual</b> | <b>Change</b>   | <b>Actual</b>                   | <b>Change</b>   |
|                                                                    | <b>result</b>  | <b>from</b>     | <b>result</b>  | <b>from</b>     | <b>result</b> | <b>from</b>     | <b>result</b>                   | <b>from</b>     |
|                                                                    |                | <b>baseline</b> |                | <b>baseline</b> |               | <b>baseline</b> |                                 | <b>baseline</b> |
| <b>Number of tender joints</b>                                     |                |                 |                |                 |               |                 |                                 |                 |
| Baseline                                                           | 22.2           |                 | 21.2           |                 | 22.1          |                 | 21.5                            |                 |
| Week 24                                                            | 7.2            | -14.7           | 6.8            | -14.3           | 8.8           | -13.3           | 7.4                             | -14.0           |
| Week 48                                                            | 5.9            | -16.5           | 5.2            | -15.8           | 6.9           | -14.3           | 5.7                             | -15.4           |
| <b>Number of swollen joints</b>                                    |                |                 |                |                 |               |                 |                                 |                 |
| Baseline                                                           | 15.1           |                 | 13.9           |                 | 15.2          |                 | 14.3                            |                 |
| Week 24                                                            | 3.3            | -11.5           | 3.5            | -10.4           | 5.6           | -9.6            | 4.1                             | -10.1           |
| Week 48                                                            | 2.5            | -12.6           | 2.5            | -11.3           | 4.0           | -10.3           | 3.0                             | -11.0           |
| <b>Patient's assessment of pain using VAS</b>                      |                |                 |                |                 |               |                 |                                 |                 |
| Baseline                                                           | 70.4           |                 | 69.3           |                 | 72.7          |                 | 70.3                            |                 |
| Week 24                                                            | 32.8           | -36.7           | 31.9           | -37.1           | 34.3          | -38.4           | 32.6                            | -37.5           |
| Week 48                                                            | 29.6           | -39.7           | 32.1           | -36.6           | 28.7          | -43.8           | 31.1                            | -38.8           |
| <b>Patient's global assessment of disease activity using VAS</b>   |                |                 |                |                 |               |                 |                                 |                 |
| Baseline                                                           | 68.9           |                 | 68.6           |                 | 71.8          |                 | 69.5                            |                 |
| Week 24                                                            | 33.4           | -35.1           | 32.2           | -35.9           | 34.4          | -37.3           | 32.9                            | -36.4           |
| Week 48                                                            | 29.7           | -38.4           | 31.6           | -36.6           | 28.9          | -42.6           | 30.8                            | -38.4           |
| <b>Physician's global assessment of disease activity using VAS</b> |                |                 |                |                 |               |                 |                                 |                 |

|                                         |      |       |      |       |      |       |      |       |
|-----------------------------------------|------|-------|------|-------|------|-------|------|-------|
| Baseline                                | 65.2 |       | 64.4 |       | 66.1 |       | 64.9 |       |
| Week 24                                 | 25.4 | -39.3 | 23.4 | -41.1 | 39.7 | -36.1 | 25.3 | -39.6 |
| Week 48                                 | 20.3 | -44.4 | 21.1 | -43.5 | 22.9 | -43.0 | 21.6 | -43.3 |
| <b>HAQ estimate of physical ability</b> |      |       |      |       |      |       |      |       |
| Baseline                                | 1.73 |       | 1.67 |       | 1.69 |       | 1.67 |       |
| Week 24                                 | 1.04 | -0.65 | 1.11 | -0.54 | 1.11 | -0.57 | 1.11 | -0.55 |
| Week 48                                 | 0.98 | -0.70 | 1.04 | -0.59 | 0.96 | -0.71 | 1.02 | -0.63 |
| <b>CRP, mg/dL</b>                       |      |       |      |       |      |       |      |       |
| Baseline                                | 2.2  |       | 2.3  |       | 3.4  |       | 2.6  |       |
| Week 24                                 | 1.0  | -1.2  | 1.0  | -1.2  | 1.3  | -2.2  | 1.1  | -1.5  |
| Week 48                                 | 0.6  | -1.5  | 1.1  | -1.2  | 0.9  | -2.4  | 1.0  | -1.5  |
| <b>ESR, mm/h</b>                        |      |       |      |       |      |       |      |       |
| Baseline                                | 55.1 |       | 56.4 |       | 59   |       | 203  |       |
| Week 24                                 | 32.4 | -23.8 | 33.2 | -23.4 | 32.7 | -18.8 | 33.0 | -22.0 |
| Week 48                                 | 29.0 | -27.0 | 32.8 | -24.4 | 25.8 | -25.6 | 30.8 | -24.7 |

*ACR* American College of Rheumatology, *CRP* C-reactive protein, *ESR* erythrocyte sedimentation rate, *EU* European Union, *HAQ* Health Assessment Questionnaire, *RTX* rituximab, *US* United States, *VAS* visual analogue scale

<sup>a</sup>Week 48 data are from the efficacy population–2<sup>nd</sup> treatment course subset (CT-P10, n=139; US-RTX, n=135; EU-RTX, n=53; Combined RTX, n=193). <sup>b</sup>US-RTX and EU-RTX groups combined.

**Table S2** Change from baseline in DAS28 by FcγR subtypes (efficacy population<sup>a</sup>)

|                  | <b>CT-P10</b>  |            | <b>US-RTX</b>  |            | <b>EU-RTX</b> |            | <b>Combined RTX<sup>b</sup></b> |            |
|------------------|----------------|------------|----------------|------------|---------------|------------|---------------------------------|------------|
|                  | <b>(n=155)</b> |            | <b>(n=144)</b> |            | <b>(n=59)</b> |            | <b>(n=203)</b>                  |            |
|                  | n              | Mean (SD)  | n              | Mean (SD)  | n             | Mean (SD)  | n                               | Mean (SD)  |
| <b>DAS28-ESR</b> |                |            |                |            |               |            |                                 |            |
| Week 24          |                |            |                |            |               |            |                                 |            |
| FcγRIIa subtype  |                |            |                |            |               |            |                                 |            |
| RR               | 23             | -2.6 (1.2) | 15             | -1.9 (1.0) | 9             | -2.6 (0.9) | 24                              | -2.2 (1.0) |
| HR+HH            | 99             | -2.6 (1.1) | 108            | -2.7 (1.1) | 40            | -2.3 (1.3) | 148                             | -2.6 (1.2) |
| FcγRIIIa subtype |                |            |                |            |               |            |                                 |            |
| FF               | 66             | -2.6 (1.1) | 53             | -2.6 (1.3) | 23            | -2.6 (1.3) | 76                              | -2.6 (1.3) |
| FV+VV            | 50             | -2.6 (1.2) | 69             | -2.6 (1.0) | 25            | -2.0 (1.4) | 94                              | -2.4 (1.1) |
| Week 48          |                |            |                |            |               |            |                                 |            |
| FcγRIIa subtype  |                |            |                |            |               |            |                                 |            |
| RR               | 21             | -3.0 (1.6) | 15             | -2.3 (1.7) | 9             | -3.0 (1.0) | 24                              | -2.6 (1.5) |
| HR+HH            | 95             | -2.9 (1.2) | 101            | -2.9 (1.4) | 38            | -3.0 (1.4) | 139                             | -2.9 (1.4) |
| FcγRIIIa subtype |                |            |                |            |               |            |                                 |            |
| FF               | 62             | -2.9 (1.3) | 49             | -2.9 (1.5) | 22            | -3.3 (1.4) | 71                              | -3.0 (1.5) |
| FV+VV            | 48             | -3.0 (1.3) | 66             | -2.8 (1.4) | 24            | -2.7 (1.2) | 90                              | -2.7 (1.3) |
| <b>DAS28-CRP</b> |                |            |                |            |               |            |                                 |            |
| Week 24          |                |            |                |            |               |            |                                 |            |
| FcγRIIa subtype  |                |            |                |            |               |            |                                 |            |
| RR               | 23             | -2.3 (1.2) | 15             | -1.7 (1.2) | 9             | -2.4 (0.8) | 24                              | -2.0 (1.1) |
| HR+HH            | 98             | -2.4 (1.0) | 108            | -2.4 (1.1) | 40            | -2.2 (1.4) | 148                             | -2.4 (1.2) |

## FcγRIIIa subtype

|       |    |            |    |            |    |            |    |            |
|-------|----|------------|----|------------|----|------------|----|------------|
| FF    | 66 | -2.4 (1.2) | 53 | -2.2 (1.3) | 23 | -2.5 (1.3) | 76 | -2.3 (1.3) |
| FV+VV | 49 | -2.3 (1.2) | 69 | -2.4 (1.0) | 25 | -2.0 (1.3) | 94 | -2.3 (1.1) |

## Week 48

## FcγRIIa subtype

|       |    |            |     |            |    |            |     |            |
|-------|----|------------|-----|------------|----|------------|-----|------------|
| RR    | 21 | -2.6 (1.3) | 15  | -2.3 (1.7) | 9  | -2.8 (0.8) | 24  | -2.4 (1.4) |
| HR+HH | 94 | -2.7 (1.1) | 100 | -2.6 (1.3) | 38 | -2.7 (1.4) | 138 | -2.7 (1.3) |

## FcγRIIIa subtype

|       |    |            |    |            |    |            |    |            |
|-------|----|------------|----|------------|----|------------|----|------------|
| FF    | 62 | -2.6 (1.0) | 49 | -2.6 (1.3) | 22 | -3.0 (1.4) | 71 | -2.7 (1.4) |
| FV+VV | 47 | -2.7 (1.3) | 65 | -2.6 (1.3) | 24 | -2.4 (1.2) | 89 | -2.5 (1.3) |

---

*CRP* C-reactive protein, *DAS28* Disease Activity Score using 28 joints, *ESR* erythrocyte

sedimentation rate, *EU* European Union, *FcγR* Fc gamma receptor, *RTX* rituximab, *SD* standard deviation, *US* United States

<sup>a</sup>Week 48 data are from the efficacy population–2<sup>nd</sup> treatment course subset (CT-P10, n=139; US-RTX, n=135; EU-RTX, n=53; Combined RTX, n=193). <sup>b</sup>US-RTX and EU-RTX groups combined.

**Table S3** Secondary pharmacokinetic parameters up to Week 48 (PK population)

| <b>Parameter (unit)</b>                             | <b>CT-P10</b>         | <b>US-RTX</b>         | <b>EU-RTX</b>         |
|-----------------------------------------------------|-----------------------|-----------------------|-----------------------|
| <b>(PK population)</b>                              |                       |                       |                       |
|                                                     | <b>n=154</b>          | <b>n=147</b>          | <b>n=59</b>           |
| <b>C<sub>max</sub> 1st course (µg/mL), n</b>        | 151                   | 146                   | 59                    |
| Mean (CV)                                           | 438.0 (24.2)          | 432.6 (27.5)          | 474.2 (21.2)          |
| <b>C<sub>max</sub> 1, 1st course (µg/mL), n</b>     | 153                   | 146                   | 59                    |
| Mean (CV)                                           | 361.6 (25.1)          | 373.8 (21.9)          | 394.3 (20.2)          |
| <b>C<sub>min</sub> W24 (µg/mL), n</b>               | 136                   | 135                   | 56                    |
| Mean (CV)                                           | 6.0 (716.1)           | 6.0 (635.9)           | 0.5 (162.2)           |
| <b>C<sub>trough</sub> 1st course (µg/mL)</b>        | 153                   | 146                   | 59                    |
| Mean (CV)                                           | 75.4 (68.4)           | 84.7 (80.8)           | 81.8 (67.3)           |
| <b>T<sub>max</sub> 1st course (h)</b>               | 153                   | 147                   | 59                    |
| Median (min, max)                                   | 339.7<br>(4.3, 557.0) | 339.6<br>(4.5, 367.3) | 339.3<br>(4.5, 346.5) |
| <b>(PK population -2nd treatment course subset)</b> |                       |                       |                       |
|                                                     | <b>n=141</b>          | <b>n=137</b>          | <b>n=57</b>           |
| <b>C<sub>max</sub> 2nd course (µg/mL), n</b>        | 141                   | 137                   | 57                    |
| Mean (CV)                                           | 418.9 (29.3)          | 420.3 (29.5)          | 464.5 (23.9)          |
| <b>C<sub>max</sub> 1, 2nd course (µg/mL), n</b>     | 141                   | 136                   | 57                    |
| Mean (CV)                                           | 353.0 (25.8)          | 350.3 (27.9)          | 382.2 (23.1)          |
| <b>C<sub>min</sub> W48 (µg/mL), n</b>               | 138                   | 132                   | 55                    |
| Mean (CV)                                           | 4.4 (784.2)           | 1.0 (169.8)           | 2.1 (354.5)           |

|                                                                    |                        |                        |                       |
|--------------------------------------------------------------------|------------------------|------------------------|-----------------------|
| <b><math>C_{\text{trough 2nd course}} (\mu\text{g/mL}),</math></b> |                        |                        |                       |
| <b>n</b>                                                           | 141                    | 136                    | 57                    |
| Mean (CV)                                                          | 83.0 (76.2)            | 80.1 (51.7)            | 88.3 (51.2)           |
| <b><math>T_{\text{max 2nd course}} (\text{h})</math></b>           |                        |                        |                       |
|                                                                    | 141                    | 137                    | 57                    |
| Median (min, max)                                                  | 339.8<br>(0.0, 4152.2) | 339.9<br>(4.3, 4125.0) | 339.7<br>(4.6, 411.8) |

$C_{\text{max 1st course}}$  maximum concentration after the second infusion in the 1st treatment course,  $C_{\text{max 1, 1st course}}$  maximum concentration after the first infusion in the 1st treatment course,  $C_{\text{max 2nd course}}$  maximum concentration after the second infusion in the 2nd treatment course,  $C_{\text{max 1, 2nd course}}$  maximum concentration after the first infusion in the 2nd treatment course,  $C_{\text{min W24}}$  predose concentration at Day 168 (Week 24),  $C_{\text{min W48}}$  predose concentration at Day 336 (Week 48),  $C_{\text{trough 1st course}}$  predose concentration at Day 14 (Week 2 prior to second infusion),  $C_{\text{trough 2nd course}}$  predose concentration at Day 182 (Week 26 prior to second infusion),  $CV$  coefficient of variation,  $EU$  European Union,  $PK$  pharmacokinetic,  $RTX$ =rituximab,  $T_{\text{max 1st course}}$  time to maximum concentration in the 1st treatment course,  $T_{\text{max 2nd course}}$  time to maximum concentration in the 2nd treatment course,  $US$  United States

**Table S4** Adverse events reported in >3% of patients in any group (safety population)

|                                                        | <b>CT-P10</b>                 | <b>US-RTX</b>    | <b>EU-RTX</b>        | <b>Combined</b>  | <b>Total</b>      |
|--------------------------------------------------------|-------------------------------|------------------|----------------------|------------------|-------------------|
|                                                        | <b>(n=161)</b>                | <b>(n=151)</b>   | <b>(n=60)</b>        | <b>RTX</b>       | <b>(n=372)</b>    |
| <b>System organ class</b>                              |                               |                  |                      | <b>(n=211)</b>   |                   |
| <b>Preferred term</b>                                  | <b>Number (%) of patients</b> |                  |                      |                  |                   |
| <b>Total number of AEs</b>                             | 350                           | 294              | 96                   | 390              | 740               |
| <b>Total patients with <math>\geq 1</math> AE</b>      | 125 (77.6)                    | 97 (64.2)        | 39<br>(65.0)         | 136 (64.5)       | 261 (70.2)        |
| <b>Infections and infestations</b>                     | <b>62 (38.5)</b>              | <b>54 (35.8)</b> | <b>17<br/>(28.3)</b> | <b>71 (33.6)</b> | <b>133 (35.8)</b> |
| Upper respiratory tract infection                      | 24 (14.9)                     | 30 (19.9)        | 9 (15.0)             | 39 (18.5)        | 63 (16.9)         |
| Urinary tract infection                                | 15 (9.3)                      | 8 (5.3)          | 2 (3.3)              | 10 (4.7)         | 25 (6.7)          |
| Lower respiratory tract infection                      | 10 (6.2)                      | 8 (5.3)          | 3 (5.0)              | 11 (5.2)         | 21 (5.6)          |
| Rhinitis                                               | 3 (1.9)                       | 6 (4.0)          | 1 (1.7)              | 7 (3.3)          | 10 (2.7)          |
| Influenza                                              | 2 (1.2)                       | 0 (0.0)          | 2 (3.3)              | 2 (0.9)          | 4 (1.1)           |
| <b>Injury, poisoning, and procedural complications</b> | <b>43 (26.7)</b>              | <b>23 (15.2)</b> | <b>14<br/>(23.3)</b> | <b>37 (17.5)</b> | <b>80 (21.5)</b>  |
| Infusion-related reaction                              | 33 (20.5)                     | 12 (7.9)         | 13<br>(21.7)         | 25 (11.8)        | 58 (15.6)         |
| Fracture                                               | 4 (2.5)                       | 6 (4.0)          | 1 (1.7)              | 7 (3.3)          | 11 (3.0)          |
| Injury                                                 | 4 (2.5)                       | 5 (3.3)          | 0 (0.0)              | 5 (2.4)          | 9 (2.4)           |
| <b>Gastrointestinal disorders</b>                      | <b>17 (10.6)</b>              | <b>19 (12.6)</b> | <b>7 (11.7)</b>      | <b>26 (12.3)</b> | <b>43 (11.6)</b>  |



|                                                            |                  |                  |                |                 |                  |
|------------------------------------------------------------|------------------|------------------|----------------|-----------------|------------------|
| Abdominal pain                                             | 4 (2.5)          | 5 (3.3)          | 1 (1.7)        | 6 (2.8)         | 10 (2.7)         |
| <b>Musculoskeletal and<br/>connective tissue disorders</b> | <b>20 (12.4)</b> | <b>14 (9.3)</b>  | <b>5 (8.3)</b> | <b>19 (9.0)</b> | <b>39 (10.5)</b> |
| Back pain                                                  | 5 (3.1)          | 4 (2.6)          | 1 (1.7)        | 5 (2.4)         | 10 (2.7)         |
| <b>Investigations</b>                                      | <b>18 (11.2)</b> | <b>16 (10.6)</b> | <b>3 (5.0)</b> | <b>19 (9.0)</b> | <b>37 (9.9)</b>  |
| Alanine aminotransferase<br>increased                      | 5 (3.1)          | 7 (4.6)          | 0 (0.0)        | 7 (3.3)         | 12 (3.2)         |
| <b>Nervous system disorders</b>                            | <b>14 (8.7)</b>  | <b>13 (8.6)</b>  | <b>2 (3.3)</b> | <b>15 (7.1)</b> | <b>29 (7.8)</b>  |
| Headache                                                   | 8 (5.0)          | 8 (5.3)          | 2 (3.3)        | 10 (4.7)        | 18 (4.8)         |
| <b>Metabolism and nutrition<br/>disorders</b>              | <b>16 (9.9)</b>  | <b>10 (6.6)</b>  | <b>2 (3.3)</b> | <b>12 (5.7)</b> | <b>28 (7.5)</b>  |
| Hypertriglyceridemia                                       | 7 (4.3)          | 4 (2.6)          | 1 (1.7)        | 5 (2.4)         | 12 (3.2)         |
| <b>Skin and subcutaneous<br/>tissue disorders</b>          | <b>11 (6.8)</b>  | <b>9 (6.0)</b>   | <b>4 (6.7)</b> | <b>13 (6.2)</b> | <b>24 (6.5)</b>  |
| Pruritus <sup>a</sup>                                      | 3 (1.9)          | 1 (0.7)          | 3 (5.0)        | 4 (1.9)         | 7 (1.9)          |
| <b>Blood and lymphatic system<br/>disorders</b>            | <b>10 (6.2)</b>  | <b>10 (6.6)</b>  | <b>4 (6.7)</b> | <b>14 (6.6)</b> | <b>24 (6.5)</b>  |
| Anemia                                                     | 6 (3.7)          | 5 (3.3)          | 2 (3.3)        | 7 (3.3)         | 13 (3.5)         |
| <b>Vascular disorders</b>                                  | <b>8 (5.0)</b>   | <b>7 (4.6)</b>   | <b>0 (0.0)</b> | <b>7 (3.3)</b>  | <b>15 (4.0)</b>  |
| Hypertension                                               | 6 (3.7)          | 4 (2.6)          | 0 (0.0)        | 4 (1.9)         | 10 (2.7)         |
| <b>Psychiatric disorders</b>                               | <b>4 (2.5)</b>   | <b>4 (2.6)</b>   | <b>3 (5.0)</b> | <b>7 (3.3)</b>  | <b>11 (3.0)</b>  |
| Depression                                                 | 1 (0.6)          | 1 (0.7)          | 2 (3.3)        | 3 (1.4)         | 4 (1.1)          |

---

*AE* adverse event, *EU* European Union, *RTX* rituximab, *US* United States

Note: The total number of AEs included all patient events. At each level of summarization, a patient was counted only once if they reported one or more events. Only the most severe event was counted.

System organ classes were arranged by decreasing total percentage, and system organ class and combined preferred terms were coded using Medical Dictionary for Regulatory Activities (MedDRA), Version 18.1

<sup>a</sup>Out of the seven pruritus cases, five cases occurred at least two weeks after the last infusion date of study drug. Two pruritus cases (both from the CT-P10 group) occurred within two weeks after the last infusion date of study drug, but both cases were considered unrelated to the study drug by the investigator.

**Table S5** Serious adverse events reported in any group (safety population)

|                                                                                  | <b>CT-P10</b>                 | <b>US-RTX</b>              | <b>EU-RTX</b>        | <b>Combined</b> | <b>Total</b>    |
|----------------------------------------------------------------------------------|-------------------------------|----------------------------|----------------------|-----------------|-----------------|
|                                                                                  | <b>(n=161)</b>                | <b>(n=151)</b>             | <b>(n=60)</b>        | <b>RTX</b>      | <b>(n=372)</b>  |
| <b>System organ class</b>                                                        | <b>(n=211)</b>                |                            |                      |                 |                 |
| <b>Preferred term</b>                                                            | <b>Number (%) of patients</b> |                            |                      |                 |                 |
| <b>Total number of SAEs</b>                                                      | <b>14</b>                     | <b>16</b>                  | <b>4</b>             | <b>20</b>       | <b>34</b>       |
| <b>Total patients with at least 1 SAE</b>                                        | <b>13 (8.1)</b>               | <b>14 (9.3)</b>            | <b>4 (6.7)</b>       | <b>18 (8.5)</b> | <b>31 (8.3)</b> |
| <b>Injury, poisoning, and procedural complications</b>                           | <b>4 (2.5)</b>                | <b>4 (2.6)<sup>a</sup></b> | <b>0 (0.0)</b>       | <b>4 (1.9)</b>  | <b>8 (2.2)</b>  |
| Fracture                                                                         | 4 (2.5)                       | 2 (1.3)                    | 0 (0.0)              | 2 (0.9)         | 6 (1.6)         |
| Injury                                                                           | 0 (0.0)                       | 2 (1.3)                    | 0 (0.0)              | 2 (0.9)         | 2 (0.5)         |
| Joint dislocation                                                                | 0 (0.0)                       | 1 (0.7)                    | 0 (0.0)              | 1 (0.5)         | 1 (0.3)         |
| <b>Infections and infestations</b>                                               | <b>2 (1.2)</b>                | <b>4 (2.6)</b>             | <b>0</b>             | <b>4 (1.9)</b>  | <b>6 (1.6)</b>  |
| Cellulitis                                                                       | 1 (0.6)                       | 1 (0.7) <sup>b</sup>       | 0 (0.0)              | 1 (0.5)         | 2 (0.5)         |
| Localized infection                                                              | 0 (0.0)                       | 1 (0.7) <sup>b</sup>       | 0 (0.0)              | 1 (0.5)         | 1 (0.3)         |
| Lower respiratory tract infection                                                | 0 (0.0)                       | 1 (0.7)                    | 0 (0.0)              | 1 (0.5)         | 1 (0.3)         |
| Pneumonia                                                                        | 1 (0.6)                       | 1 (0.7) <sup>b</sup>       | 0 (0.0)              | 1 (0.5)         | 2 (0.5)         |
| <b>Blood and lymphatic system disorders</b>                                      | <b>1 (0.6)</b>                | <b>1 (0.7)</b>             | <b>1 (1.7)</b>       | <b>2 (0.9)</b>  | <b>3 (0.8)</b>  |
| Leukopenia                                                                       | 0 (0.0)                       | 0 (0.0)                    | 1 (1.7) <sup>b</sup> | 1 (0.5)         | 1 (0.3)         |
| Pancytopenia                                                                     | 1 (0.6)                       | 1 (0.7) <sup>b</sup>       | 0 (0.0)              | 1 (0.5)         | 2 (0.5)         |
| <b>Neoplasms benign, malignant, and unspecified (including cysts and polyps)</b> | <b>0 (0.0)</b>                | <b>2 (1.3)</b>             | <b>3 (5.0)</b>       | <b>5 (2.4)</b>  | <b>5 (1.3)</b>  |

|                                                             |                |                      |                |                |                |
|-------------------------------------------------------------|----------------|----------------------|----------------|----------------|----------------|
| Adenocarcinoma of colon                                     | 0 (0.0)        | 0 (0.0)              | 1 (1.7)        | 1 (0.5)        | 1 (0.3)        |
| Bladder cancer                                              | 0 (0.0)        | 1 (0.7)              | 0 (0.0)        | 1 (0.5)        | 1 (0.3)        |
| Breast cancer                                               | 0 (0.0)        | 1 (0.7)              | 1 (0.7)        | 2 (0.9)        | 2 (0.5)        |
| Lymphangioma                                                | 0 (0.0)        | 0 (0.0)              | 1 (1.7)        | 1 (0.5)        | 1 (0.3)        |
| <b>Gastrointestinal disorders</b>                           | <b>0 (0.0)</b> | <b>2 (1.3)</b>       | <b>0 (0.0)</b> | <b>2 (0.9)</b> | <b>2 (0.5)</b> |
| Colitis ischemic                                            | 0 (0.0)        | 1 (0.7)              | 0 (0.0)        | 1 (0.5)        | 1 (0.3)        |
| Intestinal obstruction                                      | 0 (0.0)        | 1 (0.7)              | 0 (0.0)        | 1 (0.5)        | 1 (0.3)        |
| <b>Hepatobiliary disorders</b>                              | <b>2 (1.2)</b> | <b>0 (0.0)</b>       | <b>0 (0.0)</b> | <b>0 (0.0)</b> | <b>2 (0.5)</b> |
| Cholecystitis                                               | 1 (0.6)        | 0 (0.0)              | 0 (0.0)        | 0 (0.0)        | 1 (0.3)        |
| Cholelithiasis                                              | 1 (0.6)        | 0 (0.0)              | 0 (0.0)        | 0 (0.0)        | 1 (0.3)        |
| <b>Musculoskeletal and connective tissue disorders</b>      | <b>1 (0.6)</b> | <b>1 (0.7)</b>       | <b>0 (0.0)</b> | <b>1 (0.5)</b> | <b>2 (0.5)</b> |
| Arthralgia                                                  | 0 (0.0)        | 1 (0.7) <sup>b</sup> | 0 (0.0)        | 1 (0.5)        | 1 (0.3)        |
| Hand deformity                                              | 1 (0.6)        | 0 (0.0)              | 0 (0.0)        | 0 (0.0)        | 1 (0.3)        |
| <b>Nervous system disorders</b>                             | <b>1 (0.6)</b> | <b>1 (0.7)</b>       | <b>0 (0.0)</b> | <b>1 (0.5)</b> | <b>2 (0.5)</b> |
| Tremor                                                      | 1 (0.6)        | 0 (0.0)              | 0 (0.0)        | 0 (0.0)        | 1 (0.3)        |
| Vertebrobasilar insufficiency                               | 0 (0.0)        | 1 (0.7)              | 0 (0.0)        | 1 (0.5)        | 1 (0.3)        |
| <b>General disorders and administration site conditions</b> | <b>1 (0.6)</b> | <b>0 (0.0)</b>       | <b>0 (0.0)</b> | <b>0 (0.0)</b> | <b>1 (0.3)</b> |
| Chest pain                                                  | 1 (0.6)        | 0 (0.0)              | 0 (0.0)        | 0 (0.0)        | 1 (0.3)        |
| <b>Renal and urinary disorders</b>                          | <b>1 (0.6)</b> | <b>0 (0.0)</b>       | <b>0 (0.0)</b> | <b>0 (0.0)</b> | <b>1 (0.3)</b> |
| Acute kidney injury                                         | 1 (0.6)        | 0 (0.0)              | 0 (0.0)        | 0 (0.0)        | 1 (0.3)        |
| <b>Respiratory, thoracic and mediastinal disorders</b>      | <b>1 (0.6)</b> | <b>0 (0.0)</b>       | <b>0 (0.0)</b> | <b>0 (0.0)</b> | <b>1 (0.3)</b> |
| Dyspnea exertional                                          | 1 (0.6)        | 0 (0.0)              | 0 (0.0)        | 0 (0.0)        | 1 (0.3)        |

*EU* European Union, *RTX* rituximab, *SAE* serious adverse event, *US* United States

Note: The total number of AEs included all patient events. At each level of summarization, a patient was counted only once if they reported one or more events. Only the most severe event was counted. System organ classes were arranged by decreasing total percentage, and system organ class and combined preferred terms were coded using Medical Dictionary for Regulatory Activities (MedDRA), Version 18.1.

<sup>a</sup>One patient had 2 SAEs (fracture and joint dislocation). <sup>b</sup>Cases related to the study drug.

**Fig. S1** Mean change from baseline in disease activity

(a) DAS28-ESR, (b) DAS28-CRP over 48 weeks in the CT-P10, US-RTX and EU-RTX groups (efficacy population <sup>a</sup>).

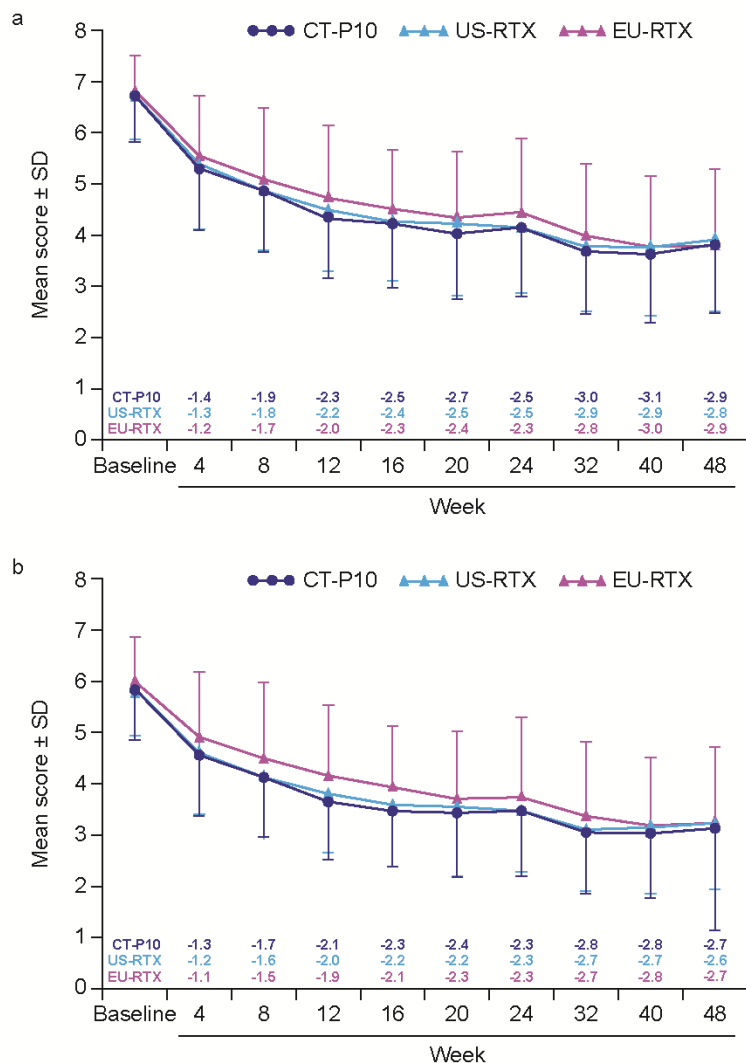

CRP C-reactive protein, DAS28 Disease Activity Score using 28 joint counts, ESR erythrocyte sedimentation rate, EU European Union, RTX rituximab, SD standard deviation, US United States

<sup>a</sup> Data after Week 24 are from the efficacy population–2<sup>nd</sup> treatment course subset.

**Fig. S2** Proportion of patients achieving clinical response at 24 and 48 weeks (efficacy population<sup>a</sup>)

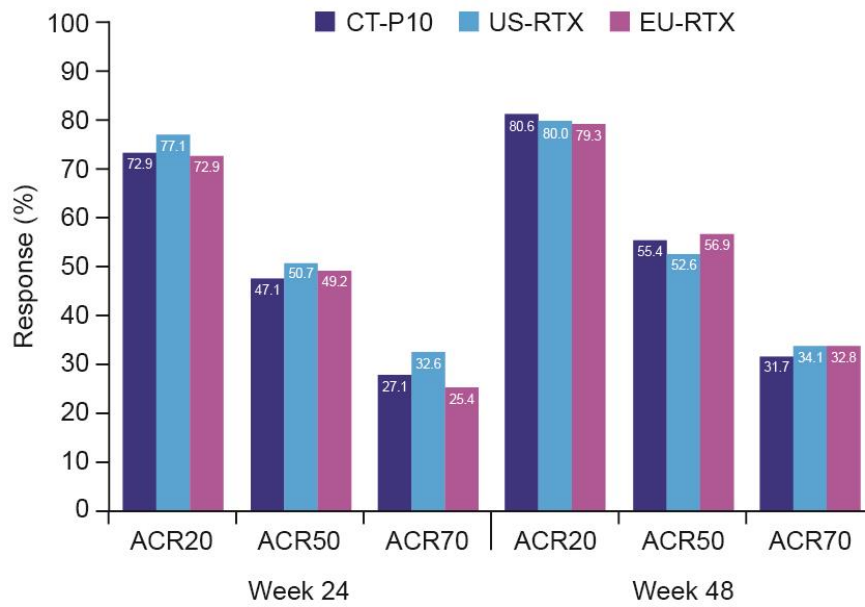

*ACR* American College of Rheumatology, *EU* European Union, *RTX* rituximab, *US* United States

<sup>a</sup>Week 48 data are from the efficacy population–2<sup>nd</sup> treatment course subset.

**Fig. S3** EULAR response at Weeks 24 and 48 (efficacy population <sup>a</sup>)

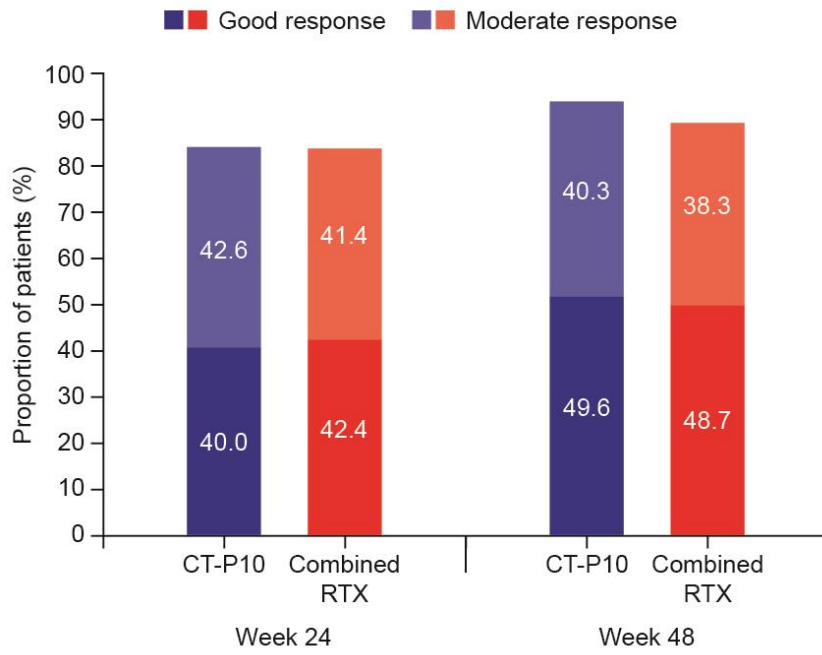

*EULAR* European League Against Rheumatism, *RTX* rituximab

<sup>a</sup>Week 48 data are from the efficacy population–2<sup>nd</sup> treatment course subset.



**Fig. S4** Mean clinical disease activity index (CDAI) score (a) and mean simplified disease activity index (SDAI) score (b) (efficacy population <sup>a</sup>)

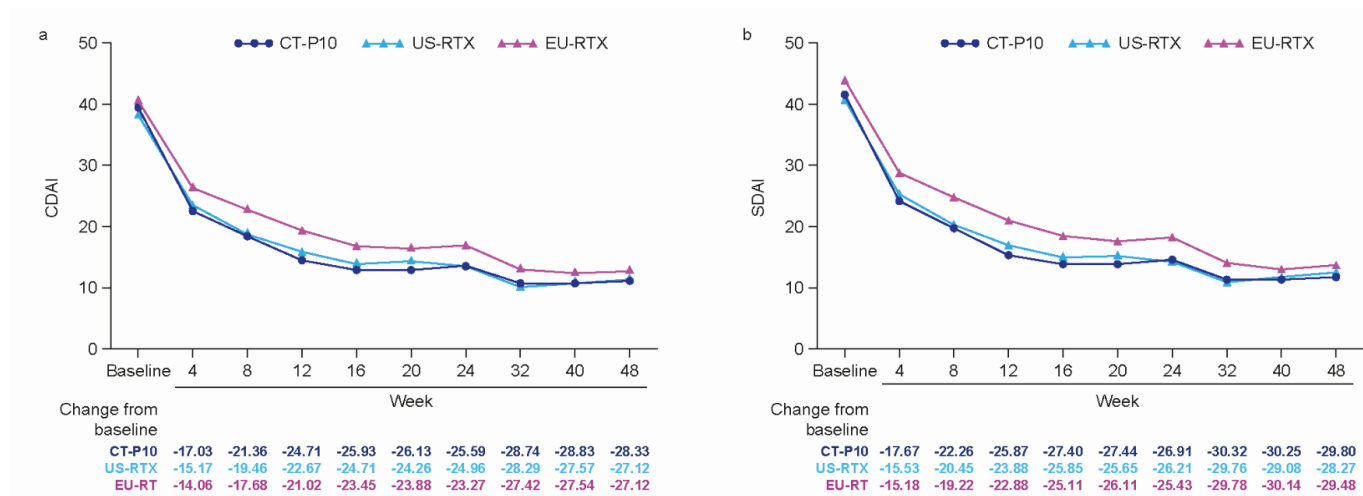

CDAI clinical disease activity index, EU European Union, RTX rituximab, SDAI simplified disease activity index, US=United States

<sup>a</sup>Week 32, week 40, and week 48 data are from the efficacy population–2<sup>nd</sup> treatment course subset.

**Fig. S5** Cumulative probability distribution of joint damage progression (efficacy population)

(a) total score, (b) Total erosion score, (c) Total JSN score.

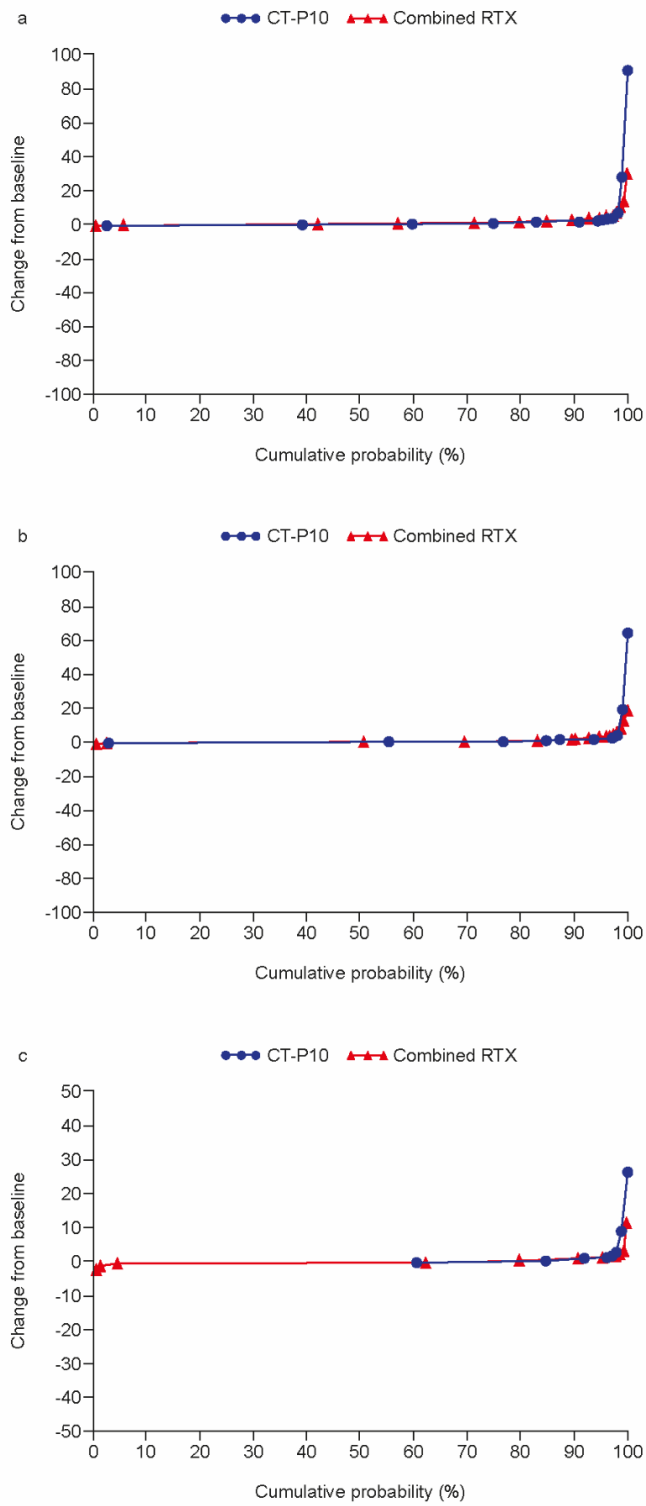

*JSN* joint space narrowing, *RTX* rituximab
